# Supplementary material
Source: Elsevier journal article supplement (https://www.sciencedirect.com/science/article/pii/S2254887419302279)
Supplement: mmc1 [file S2254887419302279:mmc1.pdf]

## **Anexo 1: Encuesta**

1. ¿Qué Guías para el manejo de la dislipemia suele utilizar en su práctica clínica diaria?
  - ☐ Guías Europeas 2011-2012 (ESC-EAS).
  - ☐ Guías Norteamericanas 2013 ACC/AHA (ATP IV).
  - ☐ Guías Norteamericanas NCEP 2002 (ATP III).
  - ☐ Guías/Algoritmos de la Administración (Conselleria de Sanitat).
  - ☐ Sociedades Científicas Españolas.
  - ☐ No utilizo ninguna guía.
2. A la hora de establecer el riesgo cardiovascular del paciente, ¿Qué tabla suele emplear?
  - ☐ Framingham.
  - ☐ SCORE.
  - ☐ No suelo usar Tablas.
  - ☐ REGICOR (Framingham adaptado a población española).
  - ☐ Tomo decisiones en función de si el paciente está en prevención primaria o secundaria.
  - ☐ Me gustaría poder usar tablas, pero no tengo medios suficientes para hacerlo de forma rutinaria en mi puesto de trabajo.
3. A la hora de elegir un fármaco hipolipemiante, qué importancia da a cada una de las variables (poner en cada cuadro un número según importancia, de modo que el factor más importante sea 1 y el menos importante sea 7):
  - ☐ Potencia en reducción de los valores LDL.
  - ☐ Potencia en reducción de HDL y Triglicéridos.
  - ☐ Coste que supone a la Administración.
  - ☐ Coste directo al paciente (“lo que el paciente paga en la Farmacia”).
  - ☐ Perfil de seguridad.
  - ☐ Grado de evidencia científica respecto de su eficacia.
  - ☐ Indicaciones de algoritmos de la Administración.

4. Señale aquellos hipolipemiantes que suele usar en su práctica clínica, poniendo de 0 (no los uso) a 6 (lo uso mucho) según frecuencia de uso, sea cual fuere el fármaco y si lo es en monoterapia o combinación:
- ☐ Estatinas.
  - ☐ Ezetimiba.
  - ☐ Ácidos omega 3.
  - ☐ Secuestradores de sales biliares (Resinas).
  - ☐ Fibratos.
  - ☐ Otros.
5. ¿Con qué periodicidad hace determinaciones de perfil lipídico a pacientes en tratamiento para dislipemia?.
- ☐ Sólo basal.
  - ☐ Mensual.
  - ☐ Trimestral.
  - ☐ Semestral.
  - ☐ Anual.
  - ☐ Bianual.
6. ¿Con qué periodicidad hace determinaciones de transaminasas a pacientes en tratamiento para dislipemia?.
- ☐ Sólo basal.
  - ☐ Mensual.
  - ☐ Trimestral.
  - ☐ Semestral.
  - ☐ Anual.
  - ☐ Bianual.
  - ☐ Sólo en caso de síntomas sugestivos de hepatopatía.

7. ¿Con qué periodicidad hace determinaciones de CK a pacientes en tratamiento para dislipemia?.
- ☐ Sólo basal.
  - ☐ Mensual.
  - ☐ Trimestral.
  - ☐ Semestral.
  - ☐ Anual.
  - ☐ Bianual.
  - ☐ Sólo en caso de síntomas sugestivos de miopatía.
8. En el tratamiento individualizado de la dislipemia, ¿Qué parámetro utiliza como objetivo?.
- ☐ Colesterol LDL.
  - ☐ Colesterol no HDL.
  - ☐ Riesgo Cardiovascular global del paciente independientemente de sus valores de LDL o analíticos en general.
  - ☐ Colesterol total y LDL.
  - ☐ Triglicéridos.
  - ☐ Colesterol LDL en función del RCV del paciente.
  - ☐ Colesterol HDL.
9. ¿En qué proporción estima que en general sus pacientes tienen los lípidos controlados?.
- ☐ 0-25%.
  - ☐ 26-49%.
  - ☐ 50-74%.
  - ☐ 75-100%.
  - ☐ No lo sé.
10. ¿Qué proporción de sus pacientes en prevención secundaria cree que tienen un adecuado control lipídico?.
- ☐ 0-25%.
  - ☐ 26-49%.
  - ☐ 50-74%.
  - ☐ 75-100%.
  - ☐ No lo sé.

11. ¿Qué proporción de sus pacientes diabéticos cree que tienen un adecuado control lipídico?.
- ☐ 0-25%.
  - ☐ 26-49%.
  - ☐ 50-74%.
  - ☐ 75-100%.
  - ☐ No lo sé.
12. A qué cree que es debido en algunos pacientes el no alcanzar los objetivos lipídicos?.
- Ordene poniendo un número de forma ascendente a cada opción, siendo 1 el que considera de mayor importancia/peso y 6 el de menor.
- ☐ Incumplimiento del paciente.
  - ☐ Ineficacia del fármaco.
  - ☐ Inercia clínica del médico.
  - ☐ Efectos secundarios del fármaco.
  - ☐ Presión de la Administración Sanitaria para la contención del gasto.
  - ☐ Otros.
13. Cuando considera que su paciente no tiene sus lípidos controlados, ¿Qué estrategia terapéutica de mejora suele emplear? (Señalar sólo una opción como la más habitual):
- ☐ Incremento la dosis hasta la máxima del fármaco.
  - ☐ Cambio a otro tipo de fármaco a dosis estándar del mismo.
  - ☐ Combino con otros hipolipemiantes.
14. ¿En qué situaciones clínicas se plantea el uso de ezetimiba?.
- ☐ En caso de intolerancia o toxicidad a estatinas.
  - ☐ En caso de no alcanzar objetivos con dosis estándar de una estatina.
  - ☐ En caso de no alcanzar objetivos con dosis máximas de una estatina.
  - ☐ No suelo emplearla.
15. ¿Cree que las estatinas como clase y respecto de otros hipolipemiantes tienen efectos “pleiotrópicos”?.
- ☐ Sí.
  - ☐ No.
  - ☐ No sé qué son los efectos “pleiotrópicos” de las estatinas.

16. En su práctica clínica diaria, ¿Suele utilizar estatinas aunque el paciente tenga valores normales de colesterol LDL?.
- ☐ Sí.
- ☐ No.
- ☐ No le veo sentido a esta pregunta.
17. ¿Conoce la polémica suscitada tras la publicación de las Guías de la ACC/AHA del año 2013?.
- ☐ Sí.
- ☐ No.
18. ¿Cree que realmente existe controversia entre estas Guías y las Europeas (ESC/EAS)?.
- ☐ Sí.
- ☐ No.
19. ¿Ha afectado la publicación de las Guías norteamericanas del 2013 la forma en que trata en su día a día la dislipemia?.
- ☐ Sí.
- ☐ No.
20. ¿Conoce el estudio IMPROVE-IT?.
- ☐ Sí.
- ☐ No.
21. ¿Cree que los resultados del IMPROVE-IT modificarán próximas Guías?
- ☐ Sí.
- ☐ No.
